# Supplementary material for: Human altruistic tendencies vary with both the costliness of selfless acts and socioeconomic status
Source: PeerJ. 2016 Oct 27;4:e2610. doi: 10.7717/peerj.2610 (PMC5088574; doi:10.7717/peerj.2610)
Supplement: File S2 — Data by suburb with number of returned letters, socioeconomic index, number of postboxes, condition of letter (stamped vs. unstamped). [file peerj-04-2610-s002.xlsx]

## Sheet: Sheet1
Letter Returned	Suburb	# Postboxes	Letter Stamped	Socioeconomic Index
Yes	Medina	1	Yes	1
Yes	Medina	1	Yes	1
Yes	Medina	1	Yes	1
Yes	Medina	1	No	1
Yes	Medina	1	No	1
Yes	Medina	1	No	1
Yes	Medina	1	No	1
No	Medina	1	Yes	1
No	Medina	1	Yes	1
No	Medina	1	Yes	1
No	Medina	1	Yes	1
No	Medina	1	Yes	1
No	Medina	1	Yes	1
No	Medina	1	Yes	1
No	Medina	1	No	1
No	Medina	1	No	1
No	Medina	1	No	1
No	Medina	1	No	1
No	Medina	1	No	1
No	Medina	1	No	1
Yes	Hillman	0	Yes	3
Yes	Hillman	0	Yes	3
Yes	Hillman	0	Yes	3
Yes	Hillman	0	Yes	3
Yes	Hillman	0	Yes	3
Yes	Hillman	0	Yes	3
Yes	Hillman	0	Yes	3
Yes	Hillman	0	No	3
Yes	Hillman	0	No	3
Yes	Hillman	0	No	3
No	Hillman	0	Yes	3
No	Hillman	0	Yes	3
No	Hillman	0	Yes	3
No	Hillman	0	No	3
No	Hillman	0	No	3
No	Hillman	0	No	3
No	Hillman	0	No	3
No	Hillman	0	No	3
No	Hillman	0	No	3
No	Hillman	0	No	3
Yes	Coolbellup	1	Yes	3
Yes	Coolbellup	1	Yes	3
Yes	Coolbellup	1	Yes	3
Yes	Coolbellup	1	No	3
Yes	Coolbellup	1	No	3
No	Coolbellup	1	Yes	3
No	Coolbellup	1	Yes	3
No	Coolbellup	1	Yes	3
No	Coolbellup	1	Yes	3
No	Coolbellup	1	Yes	3
No	Coolbellup	1	Yes	3
No	Coolbellup	1	Yes	3
No	Coolbellup	1	No	3
No	Coolbellup	1	No	3
No	Coolbellup	1	No	3
No	Coolbellup	1	No	3
No	Coolbellup	1	No	3
No	Coolbellup	1	No	3
No	Coolbellup	1	No	3
No	Coolbellup	1	No	3
Yes	Kwinana	1	Yes	2
Yes	Kwinana	1	Yes	2
Yes	Kwinana	1	Yes	2
Yes	Kwinana	1	Yes	2
Yes	Kwinana	1	Yes	2
Yes	Kwinana	1	No	2
No	Kwinana	1	Yes	2
No	Kwinana	1	Yes	2
No	Kwinana	1	Yes	2
No	Kwinana	1	Yes	2
No	Kwinana	1	Yes	2
No	Kwinana	1	No	2
No	Kwinana	1	No	2
No	Kwinana	1	No	2
No	Kwinana	1	No	2
No	Kwinana	1	No	2
No	Kwinana	1	No	2
No	Kwinana	1	No	2
No	Kwinana	1	No	2
No	Kwinana	1	No	2
Yes	Warnbro	1	Yes	4
Yes	Warnbro	1	Yes	4
Yes	Warnbro	1	Yes	4
Yes	Warnbro	1	Yes	4
Yes	Warnbro	1	No	4
No	Warnbro	1	Yes	4
No	Warnbro	1	Yes	4
No	Warnbro	1	Yes	4
No	Warnbro	1	Yes	4
No	Warnbro	1	Yes	4
No	Warnbro	1	Yes	4
No	Warnbro	1	No	4
No	Warnbro	1	No	4
No	Warnbro	1	No	4
No	Warnbro	1	No	4
No	Warnbro	1	No	4
No	Warnbro	1	No	4
No	Warnbro	1	No	4
No	Warnbro	1	No	4
No	Warnbro	1	No	4
Yes	Rivervale	3	Yes	5
Yes	Rivervale	3	Yes	5
Yes	Rivervale	3	Yes	5
Yes	Rivervale	3	Yes	5
Yes	Rivervale	3	Yes	5
Yes	Rivervale	3	No	5
Yes	Rivervale	3	No	5
Yes	Rivervale	3	Yes	5
No	Rivervale	3	Yes	5
No	Rivervale	3	Yes	5
No	Rivervale	3	Yes	5
No	Rivervale	3	Yes	5
No	Rivervale	3	No	5
No	Rivervale	3	No	5
No	Rivervale	3	No	5
No	Rivervale	3	No	5
No	Rivervale	3	No	5
No	Rivervale	3	No	5
No	Rivervale	3	No	5
No	Rivervale	3	No	5
Yes	Madeley	1	Yes	7
Yes	Madeley	1	Yes	7
Yes	Madeley	1	Yes	7
Yes	Madeley	1	Yes	7
Yes	Madeley	1	Yes	7
Yes	Madeley	1	Yes	7
Yes	Madeley	1	Yes	7
Yes	Madeley	1	No	7
Yes	Madeley	1	No	7
No	Madeley	1	Yes	7
No	Madeley	1	Yes	7
No	Madeley	1	Yes	7
No	Madeley	1	No	7
No	Madeley	1	No	7
No	Madeley	1	No	7
No	Madeley	1	No	7
No	Madeley	1	No	7
No	Madeley	1	No	7
No	Madeley	1	No	7
No	Madeley	1	No	7
Yes	Willagee	1	Yes	5
Yes	Willagee	1	Yes	5
Yes	Willagee	1	Yes	5
Yes	Willagee	1	Yes	5
Yes	Willagee	1	Yes	5
Yes	Willagee	1	No	5
Yes	Willagee	1	No	5
Yes	Willagee	1	No	5
No	Willagee	1	Yes	5
No	Willagee	1	Yes	5
No	Willagee	1	Yes	5
No	Willagee	1	Yes	5
No	Willagee	1	Yes	5
No	Willagee	1	No	5
No	Willagee	1	No	5
No	Willagee	1	No	5
No	Willagee	1	No	5
No	Willagee	1	No	5
No	Willagee	1	No	5
No	Willagee	1	No	5
Yes	Kingsley	3	Yes	8
Yes	Kingsley	3	Yes	8
Yes	Kingsley	3	Yes	8
Yes	Kingsley	3	Yes	8
Yes	Kingsley	3	No	8
Yes	Kingsley	3	No	8
Yes	Kingsley	3	No	8
Yes	Kingsley	3	No	8
Yes	Kingsley	3	No	8
No	Kingsley	3	Yes	8
No	Kingsley	3	Yes	8
No	Kingsley	3	Yes	8
No	Kingsley	3	Yes	8
No	Kingsley	3	Yes	8
No	Kingsley	3	Yes	8
No	Kingsley	3	No	8
No	Kingsley	3	No	8
No	Kingsley	3	No	8
No	Kingsley	3	No	8
No	Kingsley	3	No	8
Yes	Kallaroo	3	Yes	6
Yes	Kallaroo	3	Yes	6
Yes	Kallaroo	3	Yes	6
Yes	Kallaroo	3	Yes	6
Yes	Kallaroo	3	Yes	6
Yes	Kallaroo	3	Yes	6
Yes	Kallaroo	3	Yes	6
Yes	Kallaroo	3	Yes	6
Yes	Kallaroo	3	Yes	6
Yes	Kallaroo	3	No	6
Yes	Kallaroo	3	No	6
Yes	Kallaroo	3	No	6
No	Kallaroo	3	Yes	6
No	Kallaroo	3	No	6
No	Kallaroo	3	No	6
No	Kallaroo	3	No	6
No	Kallaroo	3	No	6
No	Kallaroo	3	No	6
No	Kallaroo	3	No	6
No	Kallaroo	3	No	6
Yes	City Beach	5	Yes	10
Yes	City Beach	5	Yes	10
Yes	City Beach	5	Yes	10
Yes	City Beach	5	Yes	10
Yes	City Beach	5	Yes	10
Yes	City Beach	5	Yes	10
Yes	City Beach	5	Yes	10
Yes	City Beach	5	Yes	10
Yes	City Beach	5	No	10
Yes	City Beach	5	No	10
Yes	City Beach	5	No	10
Yes	City Beach	5	No	10
Yes	City Beach	5	No	10
No	City Beach	5	Yes	10
No	City Beach	5	Yes	10
No	City Beach	5	No	10
No	City Beach	5	No	10
No	City Beach	5	No	10
No	City Beach	5	No	10
No	City Beach	5	No	10
Yes	Cottesloe	8	Yes	9
Yes	Cottesloe	8	Yes	9
Yes	Cottesloe	8	Yes	9
Yes	Cottesloe	8	Yes	9
Yes	Cottesloe	8	Yes	9
Yes	Cottesloe	8	Yes	9
Yes	Cottesloe	8	No	9
Yes	Cottesloe	8	No	9
Yes	Cottesloe	8	No	9
Yes	Cottesloe	8	No	9
No	Cottesloe	8	Yes	9
No	Cottesloe	8	Yes	9
No	Cottesloe	8	Yes	9
No	Cottesloe	8	Yes	9
No	Cottesloe	8	No	9
No	Cottesloe	8	No	9
No	Cottesloe	8	No	9
No	Cottesloe	8	No	9
No	Cottesloe	8	No	9
No	Cottesloe	8	No	9
Yes	Dalkeith	5	Yes	10
Yes	Dalkeith	5	Yes	10
Yes	Dalkeith	5	Yes	10
Yes	Dalkeith	5	Yes	10
Yes	Dalkeith	5	Yes	10
Yes	Dalkeith	5	Yes	10
Yes	Dalkeith	5	Yes	10
Yes	Dalkeith	5	Yes	10
Yes	Dalkeith	5	Yes	10
Yes	Dalkeith	5	No	10
Yes	Dalkeith	5	No	10
Yes	Dalkeith	5	No	10
Yes	Dalkeith	5	Yes	10
No	Dalkeith	5	No	10
No	Dalkeith	5	No	10
No	Dalkeith	5	No	10
No	Dalkeith	5	No	10
No	Dalkeith	5	No	10
No	Dalkeith	5	No	10
No	Dalkeith	5	No	10
Yes	Nedlands	10	Yes	9
Yes	Nedlands	10	Yes	9
Yes	Nedlands	10	Yes	9
Yes	Nedlands	10	Yes	9
Yes	Nedlands	10	Yes	9
Yes	Nedlands	10	Yes	9
Yes	Nedlands	10	Yes	9
Yes	Nedlands	10	Yes	9
Yes	Nedlands	10	No	9
Yes	Nedlands	10	No	9
Yes	Nedlands	10	No	9
No	Nedlands	10	Yes	9
No	Nedlands	10	Yes	9
No	Nedlands	10	No	9
No	Nedlands	10	No	9
No	Nedlands	10	No	9
No	Nedlands	10	No	9
No	Nedlands	10	No	9
No	Nedlands	10	No	9
No	Nedlands	10	No	9
Yes	Peppermint Grove	0	Yes	10
Yes	Peppermint Grove	0	Yes	10
Yes	Peppermint Grove	0	Yes	10
Yes	Peppermint Grove	0	Yes	10
Yes	Peppermint Grove	0	Yes	10
Yes	Peppermint Grove	0	Yes	10
Yes	Peppermint Grove	0	Yes	10
Yes	Peppermint Grove	0	Yes	10
Yes	Peppermint Grove	0	No	10
Yes	Peppermint Grove	0	No	10
Yes	Peppermint Grove	0	No	10
Yes	Peppermint Grove	0	No	10
No	Peppermint Grove	0	Yes	10
No	Peppermint Grove	0	Yes	10
No	Peppermint Grove	0	No	10
No	Peppermint Grove	0	No	10
No	Peppermint Grove	0	No	10
No	Peppermint Grove	0	No	10
No	Peppermint Grove	0	No	10
No	Peppermint Grove	0	No	10
